# Supplementary material for: Factors influencing COVID-19 vaccination intention among university students: A cross-sectional study in Malaysia
Source: PubMed Central journal article supplement — Biosaf Health. 2022 Dec 26;5(1):37–44. doi: 10.1016/j.bsheal.2022.12.005 (PMC9792187; doi:10.1016/j.bsheal.2022.12.005), 2022-12-26
Supplement: mmc1.pdf [file mmc1.pdf]

**Supplementary 1.** Descriptive statistics on six main themes assessed among participants (N = 1,274).

| Themes                                                                                                                                         | Strongly disagree (N) | Disagree (N) | Agree (N) | Strongly agree (N) | Mean | Standard deviation |
|------------------------------------------------------------------------------------------------------------------------------------------------|-----------------------|--------------|-----------|--------------------|------|--------------------|
| <b>(a) Risk perception of COVID-19</b>                                                                                                         |                       |              |           |                    |      |                    |
| I am worried about COVID-19.                                                                                                                   | 25                    | 24           | 424       | 801                |      |                    |
| I am worried that I will be infected with COVID-19 in the future.                                                                              | 29                    | 67           | 434       | 744                |      |                    |
| I am worried that my family members will be infected with COVID-19.                                                                            | 25                    | 24           | 308       | 917                |      |                    |
| I am worried that my friends will be infected with COVID-19.                                                                                   | 26                    | 40           | 422       | 786                | 3.58 | 0.56               |
| The problem of the COVID-19 outbreak is vital to people in my country.                                                                         | 26                    | 27           | 350       | 871                |      |                    |
| I am worried that many people in my country will be infected with COVID-19 in the future.                                                      | 25                    | 34           | 342       | 873                |      |                    |
| For me, getting sick with COVID-19 can be severe.                                                                                              | 27                    | 46           | 365       | 836                |      |                    |
| <b>(b) Social norm of COVID-19 vaccination</b>                                                                                                 |                       |              |           |                    |      |                    |
| If I tell my parents that I intend to vaccinate against COVID-19 when a vaccine is available, they will respond positively.                    | 13                    | 36           | 319       | 906                |      |                    |
| If I tell my friends and relatives that I intend to get vaccinated against COVID-19 when a vaccine is available, they will respond positively. | 10                    | 43           | 369       | 852                | 3.66 | 0.52               |
| Most of my friends will support the COVID-19 vaccine.                                                                                          | 10                    | 19           | 312       | 933                |      |                    |
| <b>(c) Perceived benefits of COVID-19 vaccination</b>                                                                                          |                       |              |           |                    |      |                    |
| Vaccination is a good idea because I feel less worried about catching COVID-19.                                                                | 20                    | 62           | 467       | 725                |      |                    |
| Vaccination decreases my chance of getting COVID-19 or its complications.                                                                      | 19                    | 59           | 449       | 747                | 3.50 | 0.61               |
| <b>(d) Perceived trust in information sources on COVID-19 vaccination</b>                                                                      |                       |              |           |                    |      |                    |
| I trust what medical doctors say about COVID-19 vaccines.                                                                                      | 11                    | 32           | 497       | 734                |      |                    |
| I trust what scientists say about COVID-19 vaccines.                                                                                           | 13                    | 29           | 507       | 725                |      |                    |
| I trust what media (e.g., TV, radio, social media, the Internet) reports about COVID-19 vaccines.                                              | 51                    | 286          | 632       | 305                |      |                    |
| I trust the information provided by authorities (e.g., MKN and MOH) about the COVID-19 vaccines.                                               | 26                    | 77           | 614       | 557                | 3.18 | 0.53               |
| I trust what my family members say about COVID-19 vaccines                                                                                     | 48                    | 338          | 635       | 253                |      |                    |
| I trust what my friends say about COVID-19 vaccines                                                                                            | 45                    | 313          | 667       | 249                |      |                    |

---

**(e) Government's response to COVID-19 pandemic**

|                                                                                                                                                                                                                       |     |     |     |     |      |      |
|-----------------------------------------------------------------------------------------------------------------------------------------------------------------------------------------------------------------------|-----|-----|-----|-----|------|------|
| The government helped me and my family meet our daily needs during the COVID-19 pandemic regarding income, food, and shelter.                                                                                         | 149 | 402 | 613 | 110 |      |      |
| The government communicated clearly to ensure that everyone had the information they needed to protect themselves and others from COVID-19, regardless of socioeconomic level, migrant status, ethnicity or language. | 156 | 289 | 632 | 197 |      |      |
| I trusted the government's reports on the spread of the pandemic and the statistics on the number of COVID-19 cases and deaths.                                                                                       | 129 | 270 | 646 | 229 |      |      |
| The government had a strong pandemic preparedness team that included public health and medical experts to manage our national response to the COVID-19 pandemic.                                                      | 224 | 394 | 499 | 157 |      |      |
| The government gave everyone access to free, reliable COVID-19 testing if they had symptoms.                                                                                                                          | 140 | 290 | 645 | 199 |      |      |
| The government ensured we had full access to the healthcare services we needed during the pandemic.                                                                                                                   | 111 | 268 | 691 | 204 | 2.72 | 0.62 |
| The government provided special protections to vulnerable groups at higher risk, such as the elderly, the poor, migrants, prisoners, and the homeless during the COVID-19 pandemic.                                   | 150 | 347 | 621 | 156 |      |      |
| The government made sure that healthcare workers had the personal protective equipment (PPE) they needed to protect them from COVID-19 at all times.                                                                  | 63  | 122 | 730 | 359 |      |      |
| The government provided mental health services to help people suffering from loneliness, depression, and anxiety caused by the COVID-19 epidemic.                                                                     | 167 | 355 | 610 | 142 |      |      |
| The government cooperated with other countries and international partners, such as the World Health Organization (WHO), to fight the COVID-19 pandemic.                                                               | 70  | 136 | 794 | 274 |      |      |

---

**(f) COVID-19 vaccination intention**

|                                                                                                                                            |    |    |     |       |      |      |
|--------------------------------------------------------------------------------------------------------------------------------------------|----|----|-----|-------|------|------|
| If I can get a vaccine for COVID-19 today, I would like to get vaccinated.                                                                 | 19 | 16 | 241 | 998   |      |      |
| If the general public in Malaysia can get a vaccine for COVID-19 today, I would like to encourage my family and friends to get vaccinated. | 12 | 20 | 232 | 1,010 | 3.75 | 0.52 |

---
