# Supplementary material for: Factors influencing COVID-19 vaccination intention among university students: A cross-sectional study in Malaysia
Source: PubMed Central journal article supplement — Biosaf Health. 2022 Dec 26;5(1):37–44. doi: 10.1016/j.bsheal.2022.12.005 (PMC9792187; doi:10.1016/j.bsheal.2022.12.005), 2022-12-26
Supplement: mmc2.pdf [file mmc2.pdf]

## Supplementary 2. Correlation between study variables

| Variables                                      | 1       | 2       | 3       | 4       | 5       | 6       | 7       | 8       | 9       | 10      | 11      | 12      | 13     | 14      | 15    | 16 | VIF  |
|------------------------------------------------|---------|---------|---------|---------|---------|---------|---------|---------|---------|---------|---------|---------|--------|---------|-------|----|------|
| 1. Knowledge score                             | -       |         |         |         |         |         |         |         |         |         |         |         |        |         |       |    | 1.11 |
| 2. Risk perception                             | 0.12**  | -       |         |         |         |         |         |         |         |         |         |         |        |         |       |    | 1.29 |
| 3. Social norm                                 | 0.23**  | 0.37**  | -       |         |         |         |         |         |         |         |         |         |        |         |       |    | 1.75 |
| 4. Perceived benefit                           | 0.18**  | 0.37**  | 0.53**  | -       |         |         |         |         |         |         |         |         |        |         |       |    | 1.59 |
| 5. Perceived trust                             | 0.14**  | 0.29**  | 0.52**  | 0.48**  | -       |         |         |         |         |         |         |         |        |         |       |    | 1.66 |
| 6. Government response                         | 0.03    | 0.13**  | 0.14**  | 0.14**  | 0.30**  | -       |         |         |         |         |         |         |        |         |       |    | 1.15 |
| 7. Age                                         | 0.10**  | -0.04   | -0.08** | -0.03   | -0.09** | 0.02    | -       |         |         |         |         |         |        |         |       |    | 2.07 |
| 8. Gender (being male)                         | -0.12** | -0.11** | -0.15** | -0.07** | -0.11** | -0.08** | 0.08**  | -       |         |         |         |         |        |         |       |    | 1.09 |
| 9. Ethnicity (being Malay)                     | 0.05    | 0.18**  | 0.16**  | 0.14**  | 0.24**  | 0.17**  | -0.04   | -0.14** | -       |         |         |         |        |         |       |    | 6.84 |
| 10. Ethnicity (being Chinese)                  | -0.03   | -0.12** | -0.07** | -0.07*  | -0.17** | -0.23** | -0.09** | 0.12**  | -0.64** | -       |         |         |        |         |       |    | 8.06 |
| 11. Ethnicity (being Indian)                   | -0.02   | -0.06*  | -0.03   | -0.05   | -0.06*  | 0.01    | -0.01   | -0.02   | -0.23** | -0.17** | -       |         |        |         |       |    | 2.76 |
| 12. Ethnicity (being Bumiputera Sabah/Sarawak) | 0.01    | 0.05    | 0.02    | 0.004   | 0.01    | 0.08**  | 0.04    | -0.01   | -0.32** | -0.24** | -0.09** | -       |        |         |       |    | 3.28 |
| 13. Religion (Islam)                           | 0.03    | 0.17**  | 0.11**  | 0.13**  | 0.21**  | 0.19**  | 0.07*   | -0.12** | 0.86**  | -0.74** | -0.25** | -0.12** | -      |         |       |    | 6.59 |
| 14. University (being a public university)     | -0.003  | 0.16**  | 0.04    | 0.06*   | 0.17**  | 0.15**  | 0.16**  | -0.004  | 0.42**  | -0.53** | -0.08** | 0.16**  | 0.47** | -       |       |    | 1.57 |
| 15. Study field (health sciences)              | 0.10**  | -0.01   | 0.04    | 0.04    | -0.001  | 0.01    | -0.05   | -0.14** | 0.07**  | -0.06*  | 0.07**  | -0.07** | 0.04   | -0.11** | -     |    | 1.07 |
| 16. Intention to get vaccinated                | 0.26**  | 0.42**  | 0.68**  | 0.60**  | 0.45**  | 0.11**  | -0.04   | -0.11** | 0.14**  | -0.04   | -0.04   | 0.01    | 0.10** | 0.04    | 0.06* | -  | -    |

VIF = variance inflation factor

\* $P < 0.05$ . \*\* $P < 0.01$ .
